# Supplementary material for: Repeated low-dose rituximab treatment based on the assessment of circulating B cells in patients with refractory myasthenia gravis
Source: PubMed Central journal article supplement — Ther Adv Neurol Disord. 2019 Sep 18;12:1756286419871187. doi: 10.1177/1756286419871187 (PMC6751534; doi:10.1177/1756286419871187), 2019-09-18

Supplemental Figure. B-cells (CD19+, expressed as percentage relative to total lymphocytes), clinical relapse and retreatment time in all patients. (▼: clinical relapse, ↓: retreatment)

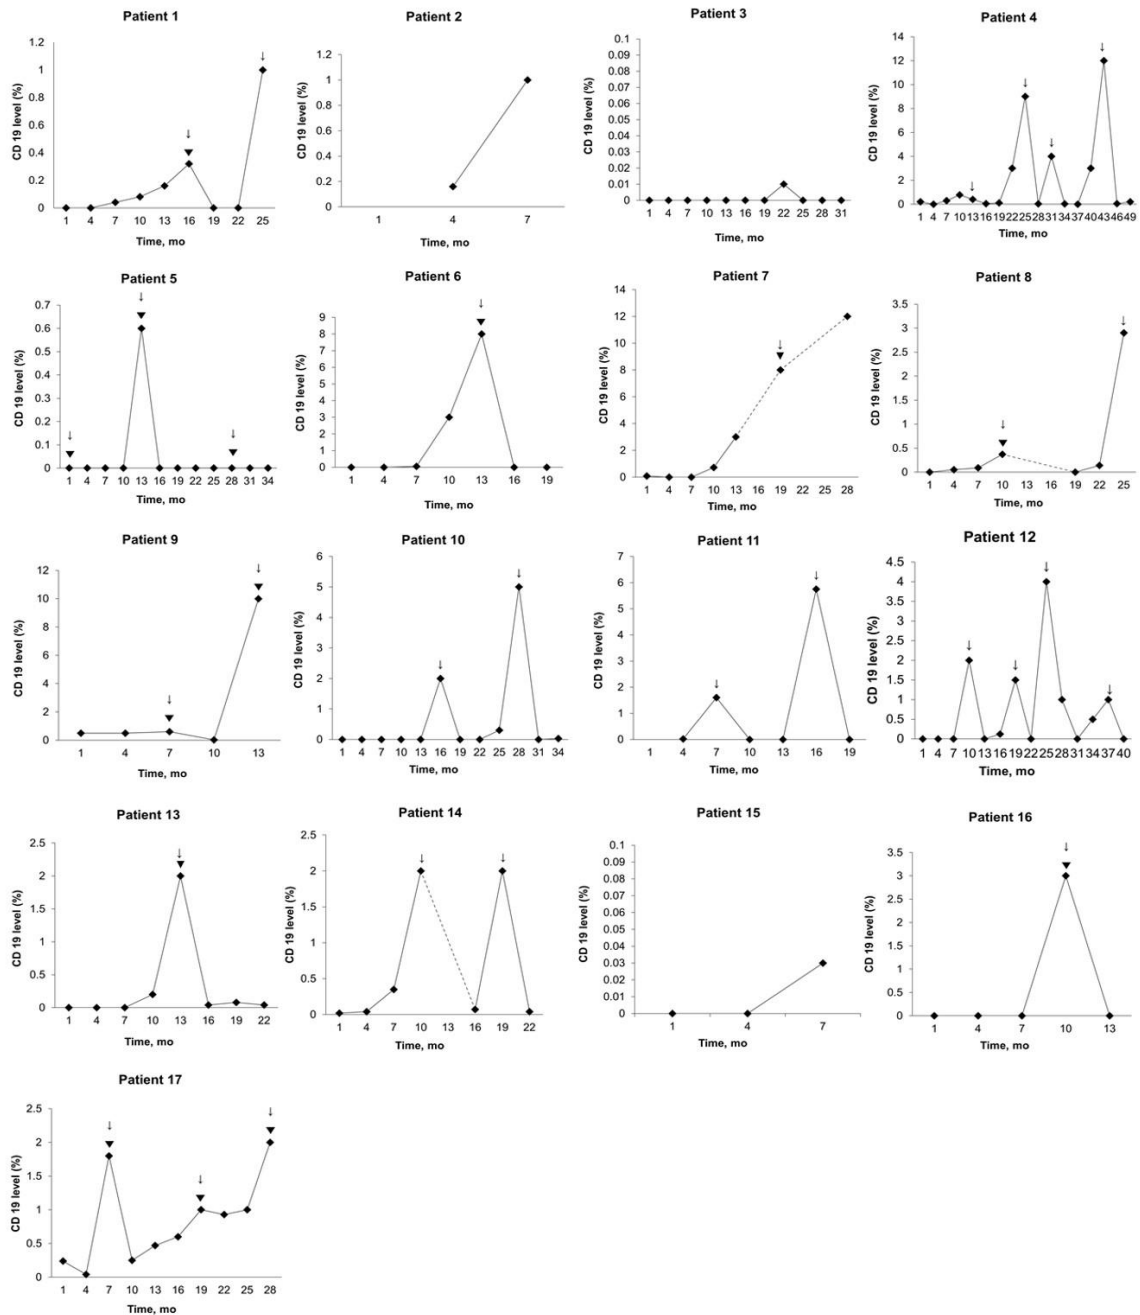

Supplement: Supplemental_Figure.pdf [file Supplemental_Figure.pdf]
